# Supplementary material for: A nanosheet molding method to estimate the size of bilayers suspended in liquids
Source: Royal Society of Chemistry journal article supplement (doi:10.1039/d2tc03765c), 2022-01-01
Supplement: d2tc03765c1.pdf [file d2tc03765c1.pdf]

## Nanosheet Molding Method to Estimate the Size of Bilayers Suspended in Liquid

Koki Sasaki, Jose A. Hernandez Gaitan, Yuki Tokuda, Koji Miyake, Yoshiaki Uchida,\* and Norikazu Nishiyama

Graduate School of Engineering Science, Osaka University, 1-3 Machikaneyama-cho, Toyonaka, Osaka 560-8531, Japan

### Supporting Information

#### Table of Contents

- Fig. S1** Thermogravimetric analysis curve of PdNSs.
- Table S1** XRD peak positions and full widths at half maximum.
- Fig. S2** Williamson-Hall plots for PdNSs and Pd fine particles.
- Fig. S3** TEM photographs and SAED pattern of PdNSs.
- Table S2** Synthetic condition dependence of the size of PdNSs
- Fig. S4** AFM images and cross-sections of PdNSs for products.
- Fig. S5** Schematic illustration of the surfactant aggregates.
- Fig. S6** Size distributions of PdNSs in the suspensions.
- Fig. S7** Process of the conversion from 4-nitrophenol to 4-aminophenol.
- Table S3** Comparison of catalytic activity for the reduction of 4-nitrophenol.
- References**

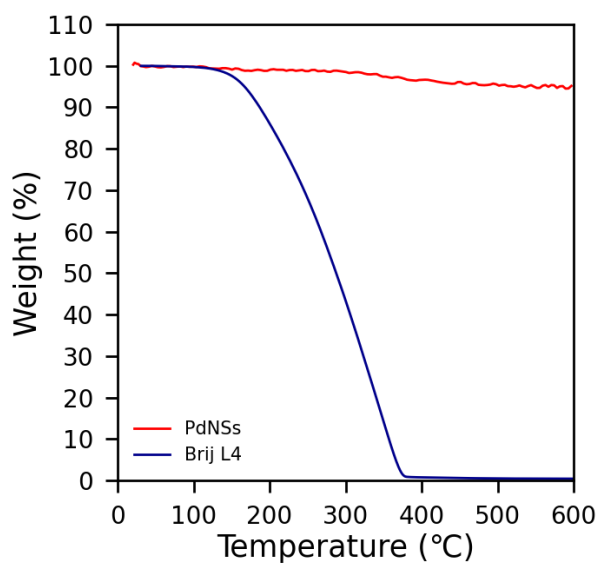

**Fig. S1** Thermogravimetric analysis curve of PdNSs. Red and blue lines denote the data for the synthesized PdNSs and Brij L4, respectively.

**Table S1** XRD peak positions and full widths at half-maximum for PdNSs and Pd fine particles.

| Peak ( $2\theta$ ) | Full Width at Half Maximum ( $^{\circ}$ ) |                |
|--------------------|-------------------------------------------|----------------|
|                    | Nanosheets                                | Fine particles |
| 40.09              | 1.420                                     | 1.390          |
| 46.80              | 1.786                                     | 1.835          |
| 68.08              | 1.820                                     | 2.150          |
| 82.21              | 1.959                                     | 2.274          |

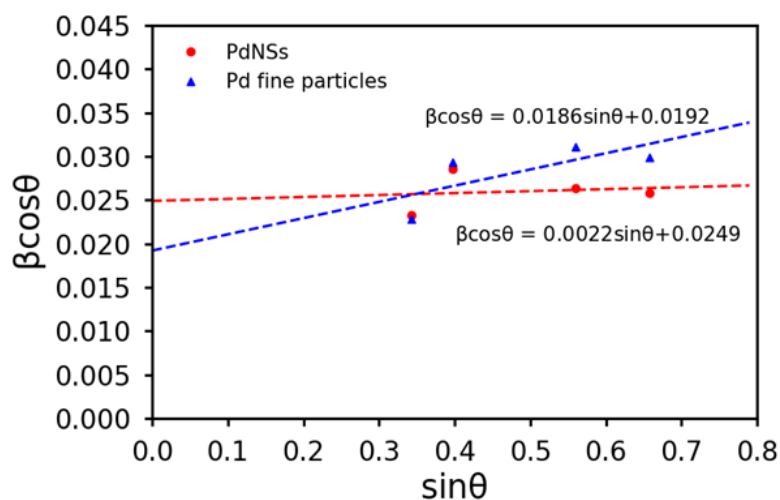

**Fig. S2** Williamson-Hall plots for PdNSs and Pd fine particles. In the equations,  $\beta$  is full width at half-maximum,  $\eta$  is internal strain,  $K$  is Scherrer constant,  $\lambda$  is the X-ray wavelength, and  $D$  is crystallite size. The Scherrer constant used was 0.94 for cubic symmetry. The estimated  $D$  for PdNSs and Pd fine particles are 5.8 nm and 7.5 nm, respectively.

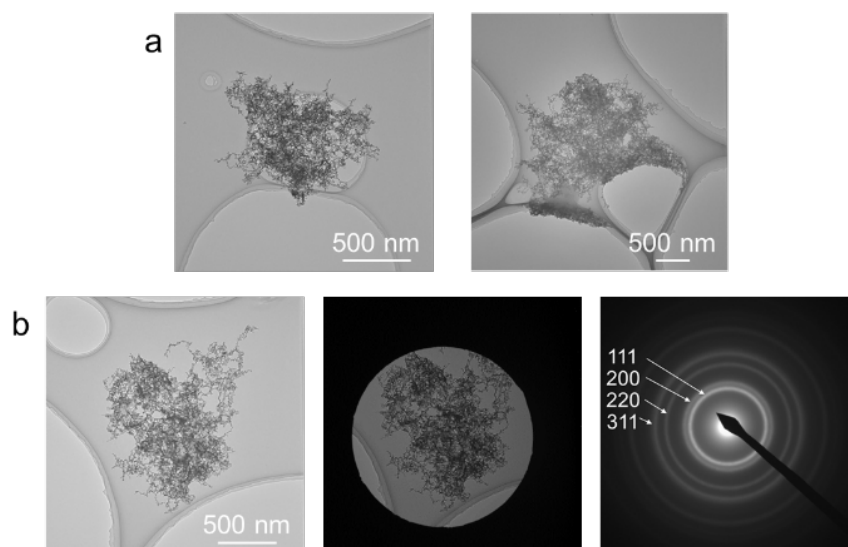

**Fig. S3** TEM photographs and SAED pattern of PdNSs. (a) TEM photographs and (b) SAED pattern.

**Table S2** Synthetic condition dependence of the size of PdNSs.

| Product   | $w_{\text{Me}}$<br>/ wt% | Width<br>/ nm | Thickness<br>/ nm |
|-----------|--------------------------|---------------|-------------------|
| <b>1</b>  | 0                        | 223 ± 53      | 8.30 ± 4.56       |
| <b>2</b>  | 0.17                     | 122 ± 18      | 3.31 ± 0.56       |
| <b>3</b>  | 0.40                     | 146 ± 31      | 3.44 ± 0.94       |
| <b>4</b>  | 0.77                     | 189 ± 41      | 2.80 ± 0.93       |
| <b>5</b>  | 0.87                     | 295 ± 55      | 1.86 ± 0.42       |
| <b>6</b>  | 1.00                     | 485 ± 65      | 2.18 ± 0.40       |
| <b>7</b>  | 1.33                     | 868 ± 208     | 2.36 ± 0.59       |
| <b>8</b>  | 1.46                     | 421 ± 75      | 2.23 ± 0.76       |
| <b>9</b>  | 1.66                     | 170 ± 59      | 1.72 ± 0.45       |
| <b>10</b> | 2.24                     | 171 ± 27      | 3.97 ± 0.84       |

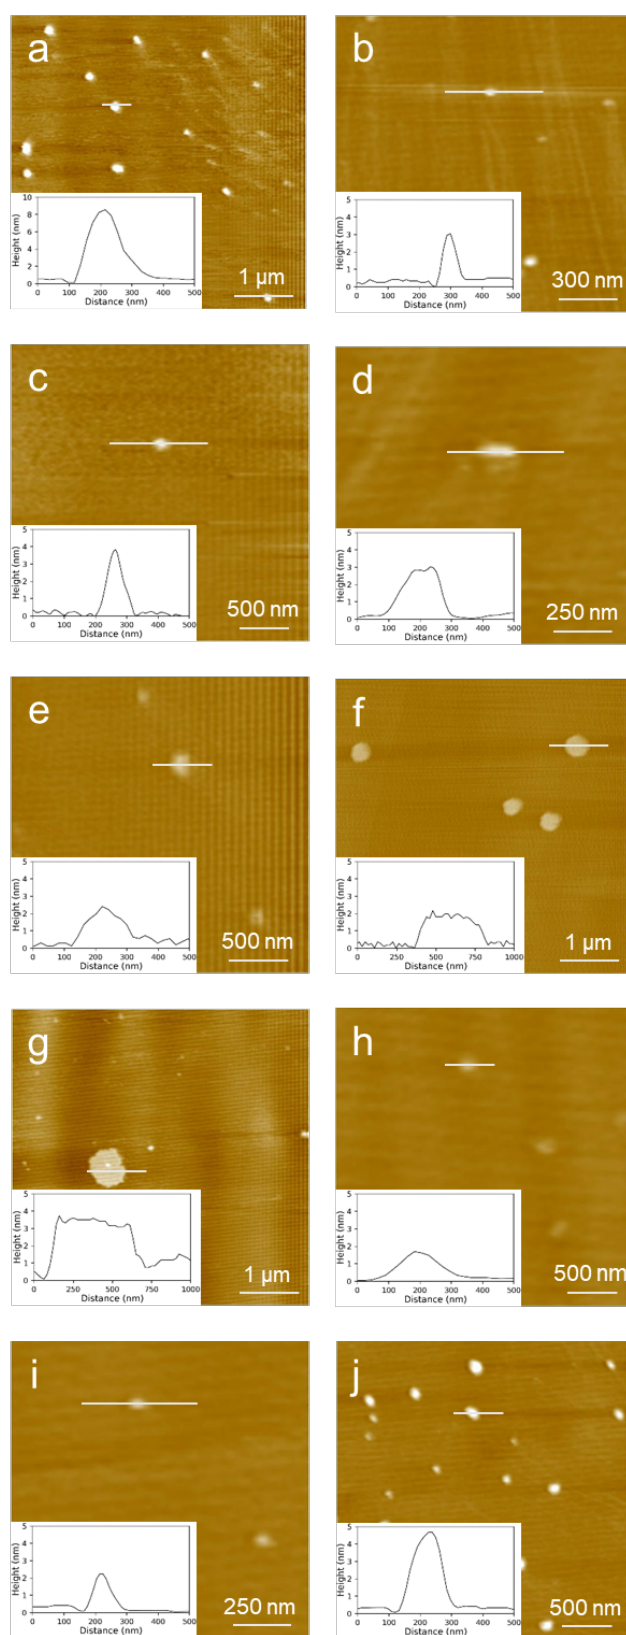

**Fig. S4** AFM images and cross-sections of PdNSs. Products (a) **1**, (b) **2**, (c) **3**, (d) **4**, (e) **5**, (f) **6**, (g) **7**, (h) **8**, (i) **9**, and (j) **10** listed in Table S2.

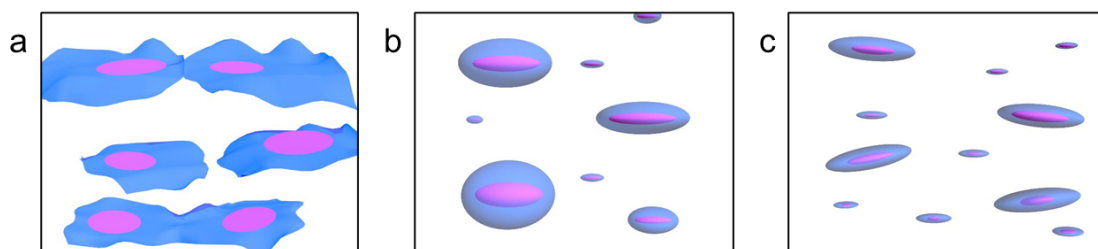

**Fig. S5** Schematic illustration of the surfactant aggregates. (a) Bilayers, (b) biaxial micelles whose thickness fluctuate, and (c) mono-dispersed biaxial micelles.

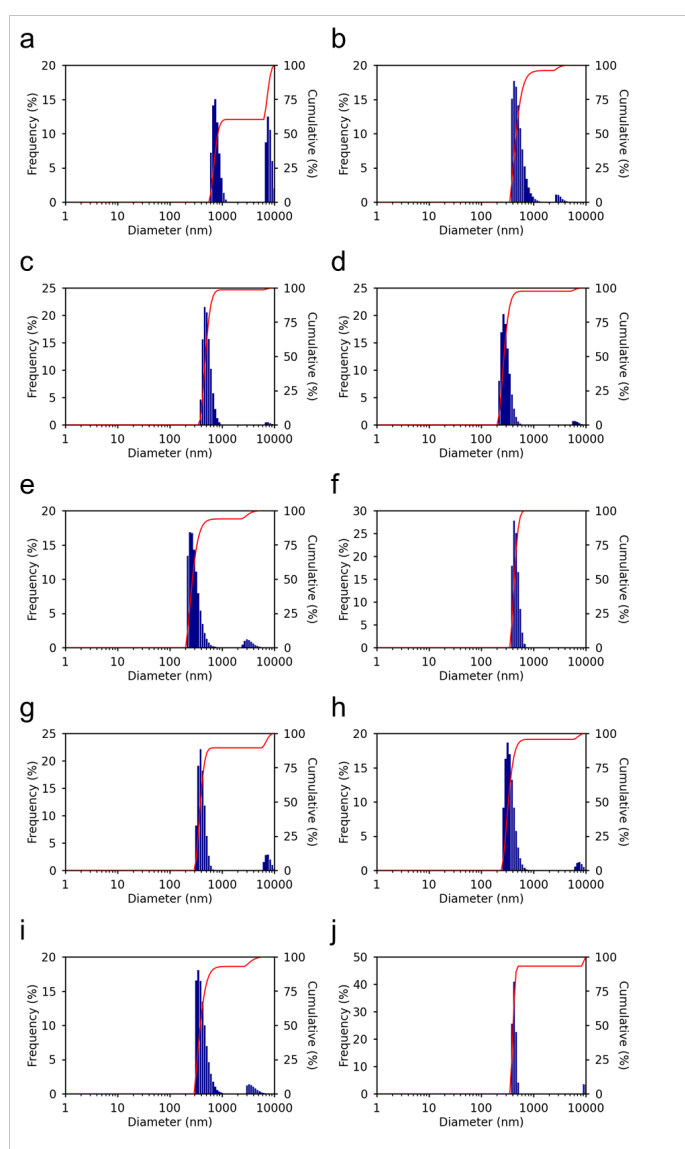

**Fig. S6** Size distributions of PdNSs in the suspensions. Products (a) **1**, (b) **2**, (c) **3**, (d) **4**, (e) **5**, (f) **6**, (g) **7**, (h) **8**, (i) **9**, and (j) **10** listed in Table S2.

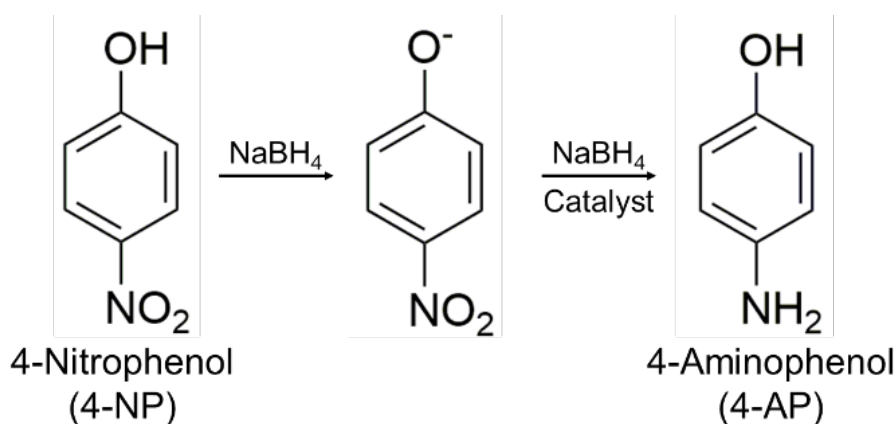

**Fig. S7** Process of the conversion from 4-nitrophenol to 4-aminophenol.

**Table S3** Comparison of catalytic activity for the reduction of 4-nitrophenol.

| Catalyst         | Pd / wt% | Size / nm                                         | $k_{\text{app}}$ / $\text{s}^{-1}\text{g}^{-1}$ | $k_{\text{nor}}$ / $\text{s}^{-1}\text{g}^{-1}\text{M}^{-1}$ | Ref.       |
|------------------|----------|---------------------------------------------------|-------------------------------------------------|--------------------------------------------------------------|------------|
| Pd nanosheets    | 100      | Width: $485 \pm 65$<br>Thickness: $2.18 \pm 0.40$ | 142                                             | 28287                                                        | This study |
| Pd nanoparticles | 100      | 90~410                                            | 0.39                                            | 15                                                           | S1         |
| Pd nanoparticles | 100      | 25                                                | 177                                             | 8992                                                         | S2         |
| Pd nanodendrites | 100      | $37.4 \pm 5.3$                                    | 98.75                                           | 1274                                                         | 36         |
| Pd/C             | 20       | 9                                                 | 1366                                            | 273200                                                       | S3         |
| Pd/CPM-2         | 1        | 70                                                | 3385                                            | 2604                                                         | S4         |

<sup>a</sup>  $k_{\text{nor}} = k_{\text{app}} / (c[\text{NaBH}_4])$ , where  $c$  is the total amount of the catalyst, and  $[\text{NaBH}_4]$  is the borohydride concentration.

## References

- (S1) D. Rambabu, C. P. Pradeep, Pooja and A. Dhir, *New J. Chem.*, 2015, **39**, 8130–8135.
- (S2) G. Fu, X. Jiang, L. Ding, L. Tao, Y. Chen, Y. Tang, Y. Zhou, S. Wei, J. Lin and T. Lu, *Appl. Catal. B Environ.*, 2013, **138–139**, 167–174.
- (S3) B. Su, Y. Jia, S. Zhang, X. Chen and M. Oyama, *Chem. Lett.*, 2014, **43**, 919–921.
- (S4) P. Veerakumar, R. Madhu, S.-M. Chen, V. Veeramani, C.-T. Hung, P.-H. Tang, C.-B. Wang and S.-B. Liu, *J. Mater. Chem. A*, 2014, **2**, 16015–16022.
